# Supplementary material
Source: publisher figshare collection journal article supplement (https://karger.figshare.com/articles/dataset/_/5241895)
Supplement: Supplementary file 1 [file 1 › 000442022_sm_Erratum.pdf]

## Erratum

---

In the article by Wang J, Fang R, Peterson A and Jiang JJ, entitled ‘The protective role of autophagy in human vocal fold fibroblasts under cigarette smoke extract exposure: a new insight into the study of Reinke’s edema’ [ORL 2016;78:26–35, DOI: 10.1159/000442022], the corresponding author Jack J. Jiang is affiliated with both institutes:

<sup>a</sup>Department of Otolaryngology-Head and Neck Surgery, Eye, Ear, Nose and Throat Hospital of Fudan University, Shanghai, China; <sup>b</sup>Division of Otolaryngology-Head and Neck Surgery, Department of Surgery, University of Wisconsin School of Medicine and Public Health, Madison, Wis., USA

Furthermore, the address of the corresponding author is as follows:

Jack J. Jiang, MD, PhD  
Department of Otolaryngology-Head and Neck Surgery  
Eye, Ear, Nose and Throat Hospital of Fudan University  
83 Fenyang Road  
Shanghai 200031 (China)  
E-Mail [jjjiang@wisc.edu](mailto:jjjiang@wisc.edu)
