# Supplementary material
Source: publisher figshare collection journal article supplement (https://karger.figshare.com/articles/dataset/_/5241895)
Supplement: Supplementary file 1 [file 1 › 000442022_sm_Figures.pdf]

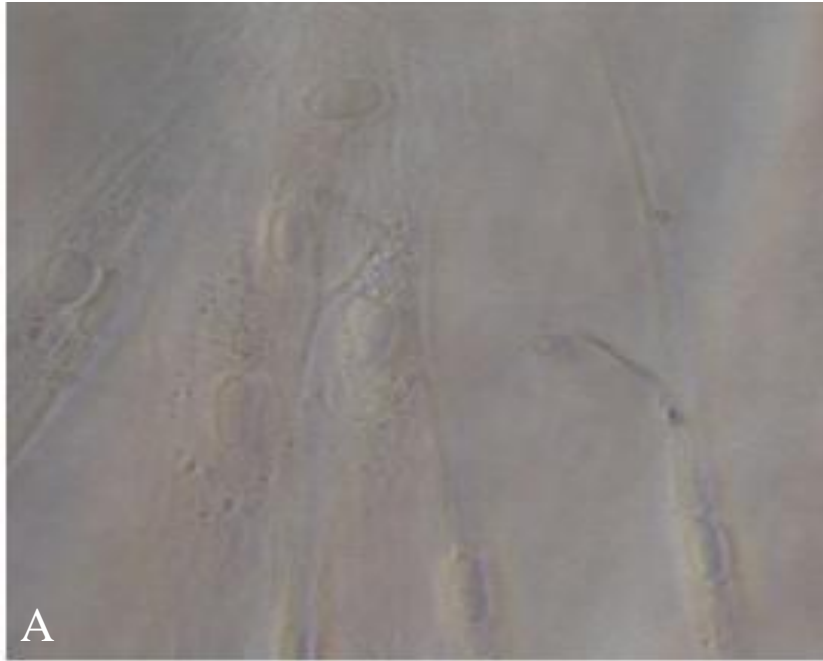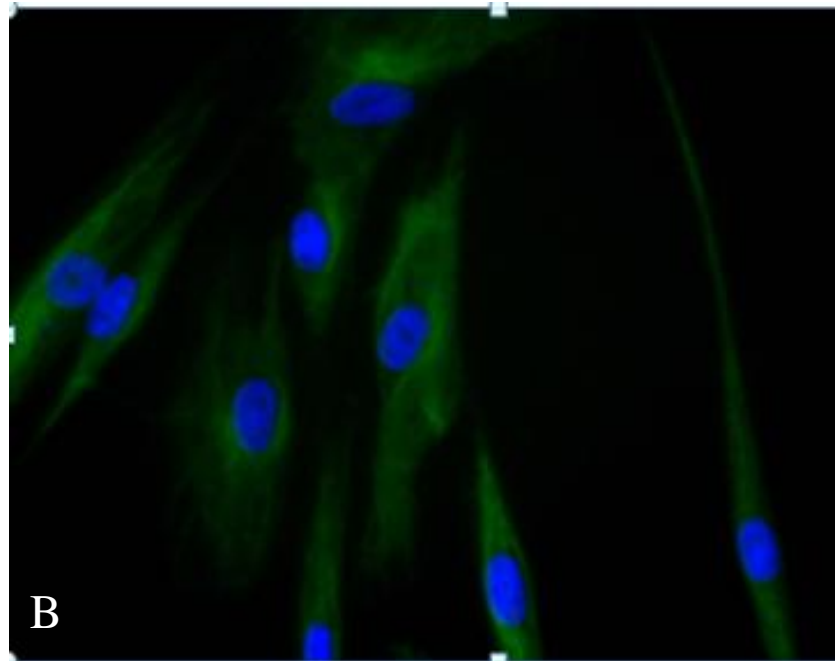

Suppl. Figure 1. Morphology observation and identification of primary cultured hVFFs. A. Bright field observation. B. Vimentin immunofluorescence signal in green and the nuclear DAPI stain is in blue ( $\times 400$ ).

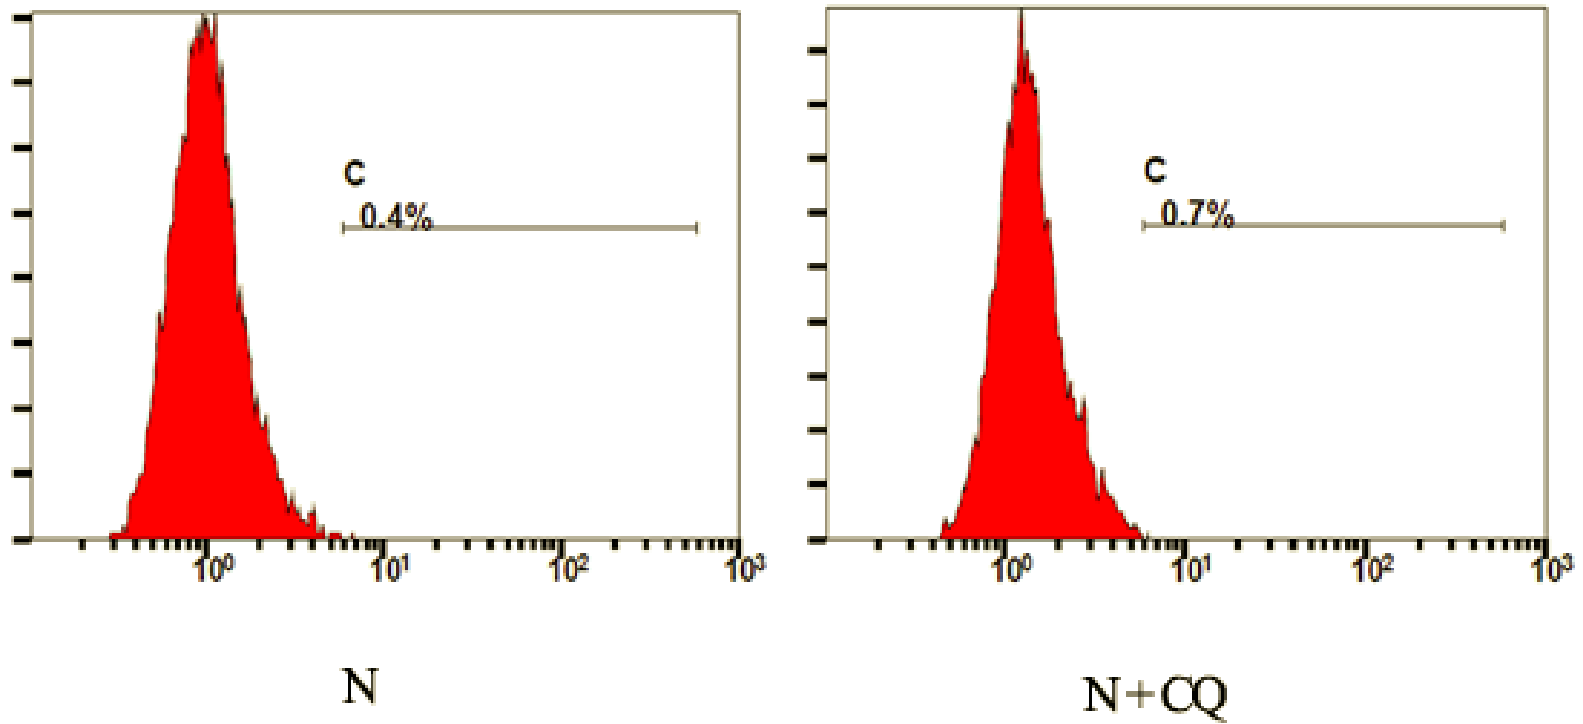

Suppl. Figure 2. No obvious change of intracellular ROS level in hVFFs treated with CQ.

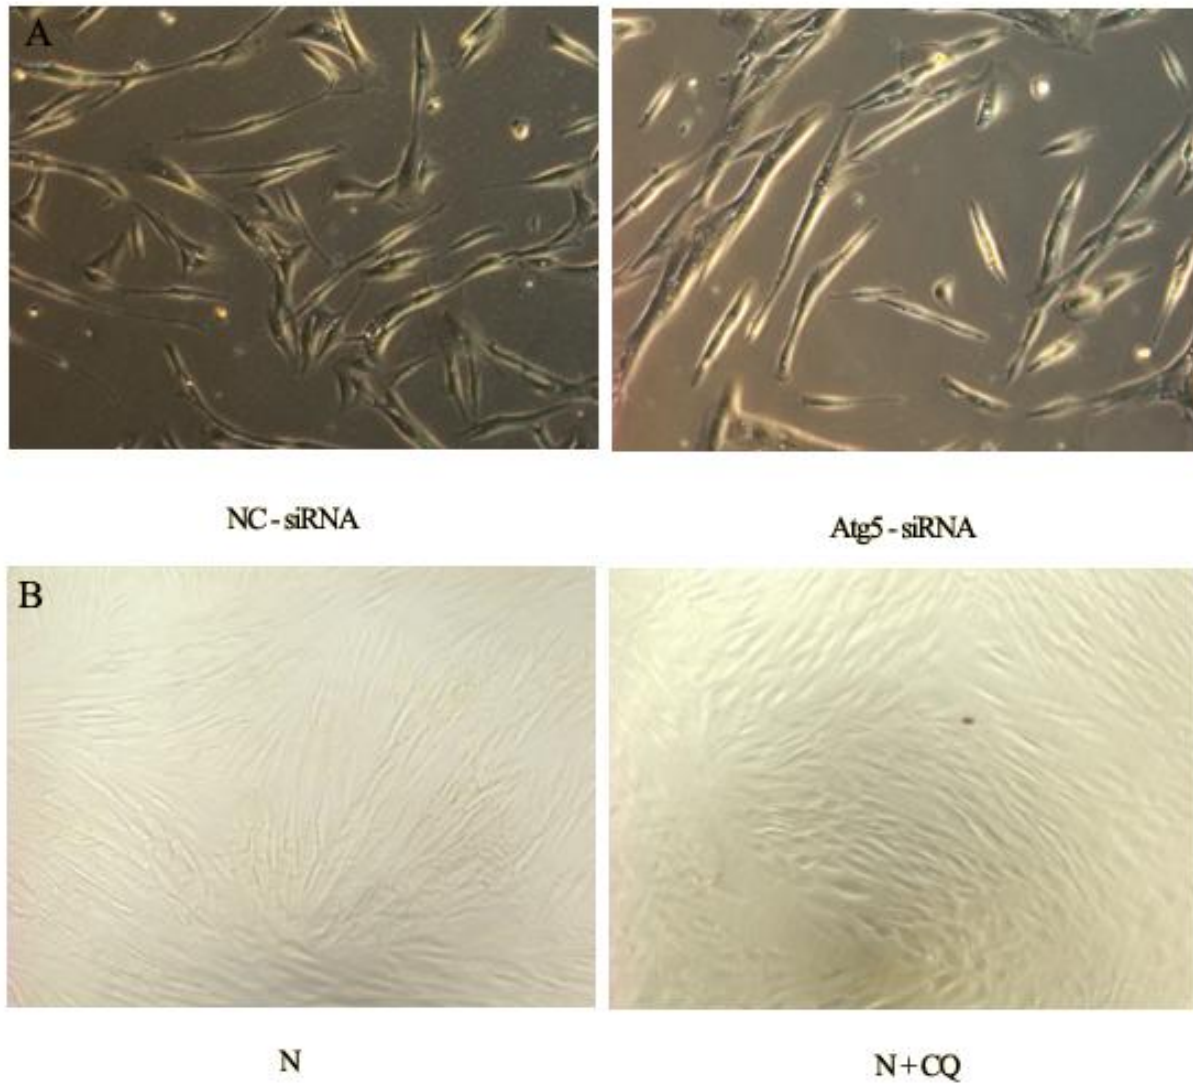

Suppl. Figure 3. The morphology of hVFFs under inversion phase contrast microscope observation. A. hVFFs were transfected with siRNAs ; B. hVFFs were pretreated with CQ ( $\times 100$ ).
